# Ecological Network Metrics: Opportunities for Synthesis

Matthew K. Lau<sup>1,\*</sup>, Stuart R. Borrett<sup>2,3</sup>, Benjamin Baiser<sup>4</sup>,  
Nicholas J. Gotelli<sup>5</sup>, Aaron M. Ellison<sup>1</sup>

1. Harvard Forest, Harvard University; 2. Department of Biology and Marine Biology, University of North Carolina Wilmington; 3. Duke Network Analysis Center, Social Science Research Institute, Duke University; 4. Department of Wildlife Ecology and Conservation, University of Florida; 5. Department of Biology, University of Vermont; \*corresponding author: Matthew K. Lau ([matthewklau@fas.harvard.edu](mailto:matthewklau@fas.harvard.edu))

## Abstract

Network ecology provides a systems basis for approaching ecological questions, such as factors that influence biological diversity, the role of particular species or particular traits in structuring ecosystems, and long-term ecological dynamics (e.g. stability). Whereas the introduction of network theory has enabled ecologists to quantify not only the degree, but also the architecture of ecological complexity, these advances have come at the cost of introducing new challenges, including new theoretical concepts and metrics, and increased data complexity and computational intensity. Synthesizing recent developments in the network ecology literature, we point to several potential solutions to these issues: integrating network metrics and their terminology across sub-disciplines; benchmarking new network algorithms and models to increase mechanistic understanding; and improving tools for sharing ecological network research, in particular “model” data provenance, to increase the reproducibility of network models and analyses. We propose that applying these solutions will aid in synthesizing ecological subdisciplines and allied fields by improving the accessibility of network methods and models.

*Keywords:* Network ecology, systems analysis, computational methods, metrics, benchmarking, data provenance

## 28 **1 Introduction**

29 Interactions are at the heart of ecology and drive many of its key questions. What are  
30 the roles of species interactions in ecological systems? When and why is biological  
31 diversity important? What factors influence the long-term dynamics of ecosystems?  
32 These are all questions with a long history in ecology (Cherrett, 1989; Council, 2003;  
33 Lubchenco et al., 1991; Sutherland et al., 2013) that are not addressed in isolation.  
34 Points of intersection include the relationship between diversity and stability (May,  
35 2001, 2006); the identity and role of species that are the main drivers of community  
36 structure (Paine, 1966, e.g. keystone species), ecosystem engineers (Jones et al.,  
37 1994), or foundation species (Dayton, 1972; Ellison et al., 2005); and the causes and  
38 consequences of introducing new species into existing assemblages (Baiser et al., 2008;  
39 Simberloff and Holle, 1999). Furthermore, “systems thinking” has been a persistent  
40 thread throughout the history of ecology (Margalef, 1963; Odum and Pinkerton,  
41 1955; Patten, 1978; Patten and Auble, 1981; Ulanowicz, 1986), dating back at least to  
42 Darwin’s *Origin of Species* in his famous pondering of an entangled bank (Bascompte  
43 and Jordano, 2014; Golley, 1993). The application of network theory has provided  
44 a formal, mathematical framework to approach systems (Bascompte and Jordano,  
45 2014; Proulx et al., 2005) and led to the development of network ecology (Borrett  
46 et al., 2014; Patten and Witkamp, 1967; Poisot et al., 2016b).

47 Network ecology can be defined as the use of network models and analyses to  
48 investigate the structure, function, and evolution of ecological systems at many scales  
49 and levels of organization (Borrett et al., 2012; Eklöf et al., 2012). The influx of  
50 network thinking throughout ecology, and ecology’s contribution to the development  
51 of network science highlights the assertion that “networks are everywhere” (Lima,  
52 2011). And, as one would expect, the field has grown rapidly, from 1% of the primary  
53 ecological literature in 1991 to over 6% in 2017 (Fig. 1A). Some examples include:  
54 applying network theory to population dynamics and spread of infectious diseases  
55 (May, 2006); description and analysis of networks of proteins in adult organisms  
56 (Stumpf et al., 2007) or during development (Hollenberg, 2007); expanding classical  
57 food webs to include parasites and non-trophic interactions (Ings et al., 2009; Kéfi  
58 et al., 2012); investigating animal movement patterns (Lédée et al., 2016) and the  
59 spatial structure of metapopulations (Dubois et al., 2016; Holstein et al., 2014);  
60 connecting biodiversity to ecosystem functioning (Creamer et al., 2016); identifying  
61 keystone species (Borrett, 2013; Zhao et al., 2016); and using social network theory  
62 in studies of animal behavior (Croft et al., 2004; Fletcher et al., 2013; Krause et al.,  
63 2003; Sih et al., 2009). Further, ideas and concepts from network ecology are being  
64 applied to investigate the sustainability of urban and industrial systems (Fang et al.,

65 2014; Layton et al., 2016; Xia et al., 2016) and elements of the food-energy-water  
66 nexus (Wang and Chen, 2016; Yang and Chen, 2016).

67 Over the past 15 years, re-occurring themes for moving network ecology for-  
68 ward have emerged from reviews, perspectives, and syntheses (e.g. Bascompte, 2010;  
69 Borrett et al., 2014; Poisot et al., 2015; Proulx et al., 2005). In this paper, we  
70 examine areas where the network approach is being applied to address important  
71 ecological questions and identify both challenges and opportunities for advancing  
72 the field. Among these are the need for shifting the focus toward mechanisms rather  
73 than observations, and increasing the resolution (e.g. individuals or traits as nodes  
74 and weighted edges of different interaction types) and replication of network models  
75 across different ecosystems and time (Ings et al., 2009; Poisot et al., 2016*b*; Wood-  
76 ward et al., 2010). After a brief primer of key concepts from network ecology, we  
77 discuss the following topics as they relate to these issues: the proliferation of ter-  
78 minology for ecological metrics with the increasing application of network methods;  
79 fully exploring the underlying assumptions of models of mechanistic processes for  
80 generating network structure; and the need for improved sharing and reproducibility  
81 of ecological network research and models. Although these topics are not new, the  
82 combination of the influx of metrics and theory and rapid increases in the computa-  
83 tional intensity of ecology are creating novel challenges. With respect to these issues,  
84 we discuss recent advances that should be explored as tools to aid in a more effective  
85 integration of network methods for synthesis across ecological (sub)disciplines.

## 86 **2 A primer of ecological networks: models and** 87 **metrics**

88 Prior to the introduction of network methods in ecology, the primary way of study-  
89 ing interactions was limited to detailed studies of behaviors and traits of individual  
90 species important to interactions, or of relationships between tightly interacting pairs  
91 of species (Carmel et al., 2013). Some ecologists were advancing whole-system meth-  
92 ods (Lindeman, 1942; Odum, 1957); however, quantifying interactions is costly, as  
93 compared to surveys of species abundances. This has created a significant barrier to  
94 studying interactions at the scale of entire communities, either at the scale of indi-  
95 viduals or species pairs, because the number of interactions becomes intractable. For  
96 instance, even if one assumes that only pairwise interactions occur among  $S$  species,  
97 the number of possible pairs is  $S(S-1)/2$ . Local assemblages of macrobes often have  
98  $10^1 - 10^2$  species, and microbial diversity can easily exceed  $10^3$  OTUs (Operational  
99 Taxonomic Units).

100 This complexity of ecological systems is one reason there is a long tradition in  
101 community ecology of studying interactions within small subsets of closely-related  
102 species (e.g. trophic guilds) and using dimensionality reducing methods based on  
103 multivariate, correlative approaches (Legendre et al., 2012). While some approaches  
104 to studying subsets of species incorporate the underlying pattern of direct and in-  
105 direct links (e. g., modules, (sensu Holt, 1997; Holt and Hoopes, 2005), the ma-  
106 jority do not. Such limitations repeatedly have led to calls for the application of  
107 “network thinking” to ecological questions (e.g. Golubski et al., 2016; Ings et al.,  
108 2009; Jacoby and Freeman, 2016; Patten and Witkamp, 1967; Proulx et al., 2005;  
109 QUINTESSENCE Consortium et al., 2016; Urban and Keitt, 2001). There are now  
110 many resources for learning about network ecology and network theory in general,  
111 and we point the reader in the direction of excellent reviews in this area (Bascompte  
112 and Jordano, 2007; Borrett et al., 2012; Brandes et al., 2013; Ings et al., 2009; Proulx  
113 et al., 2005) and more comprehensive introductions (Brandes et al., 2005; Estrada,  
114 2015; Newman, 2010).

115 Network ecology employs network theory to quantify the structure of ecological  
116 interactions. All networks consist of sets of interacting nodes (e.g. species, non-  
117 living nutrient pools, habitat patches) whose relationships are represented by edges  
118 (e.g. nutrient or energy transfers, pollination, movement of individuals). Conceptu-  
119 ally, a network is a set of things or objects with connections among them. Stated  
120 mathematically, a network is a generic relational-model comprised of a set of objects  
121 represented by nodes or vertices ( $N$ ) and a set of edges ( $E$ ) that map one or more  
122 relationships among the nodes,  $G = (N, E)$ . A canonical ecological example of a net-  
123 work is a food-web diagram, in which the nodes represent species, groups of species,  
124 or non-living resources, and the *edges* map the relationship who-eats-whom.

125 The analysis of networks is inherently hierarchical, ranging from the entire net-  
126 work down to individual nodes and edges. Depending on the characteristics and level  
127 of detail of the information provided for a given model, there is a large number of  
128 network analyses and metrics that can be used to characterize the system at multiple  
129 levels (similar to Hines and Borrett, 2014; Wasserman and Faust, 1994), including:  
130 (1) the whole network level (i.e., the entire network), (2) the sub-network level (i.e.,  
131 groups of two or more nodes and their edges), and (3) the individual node or edge  
132 level (Fig. 2).

133 Network-level metrics integrate information over the entire set of nodes and edges.  
134 For example, the number of nodes (e.g., the species richness of a food web) and  
135 the density of connections or connectance are both network-level statistics used to  
136 describes the overall complexity of a network and have been investigated by ecologists  
137 for over 40 years (Allesina and Tang, 2012; May, 1972).

138 Sub-network level analyses focus on identifying specific subsets of nodes and  
139 edges. There are a variety of groups that have different names (e.g., module, motif,  
140 cluster, clique, environ) and different methods for measurement. Sub-networks often  
141 represent more tractable and meaningful units of study than individual nodes and  
142 edges on the one hand or entire networks on the other. For example, in landscape  
143 and population ecology, the preferential movement of individuals and genes (edges)  
144 between habitat patches (nodes) has implications for conservation of populations and  
145 the design of preserves (Calabrese and Fagan, 2004; Fletcher et al., 2013; Holt and  
146 Hoopes, 2005). Also, both nodes and edges can be divided into classes. An example  
147 of this is the bipartite graph, in which interactions occur primarily between, rather  
148 than within, each class or “part” of the community. A bipartite network has only  
149 two classes of nodes, such as in a pollination network in which the community is  
150 divided into plants being pollinated and insects that do the pollination (Petanidou  
151 et al., 2008). In this network, edges representing pollination visits can only map  
152 between two nodes in the different classes.

153 Metrics at the individual node or edge level quantify differences in relative impor-  
154 tance. Whether we are interested in an individual or species that transmits disease,  
155 species whose removal will result in secondary extinctions, or key habitat patches  
156 that connect fragmented landscapes, identifying important nodes is a critical com-  
157 ponent of network analysis. Another type of node or edge-level metric classifies  
158 nodes or edges according to their roles within a network. This classification can use  
159 information from differing levels. Additionally, nodes and edges can have variable  
160 characteristics. Edges can be weighted and they can map a directed relationship  
161 (as opposed to a symmetric or undirected relationship). For example, in ecosystem  
162 networks, the edges show the directed movement of energy or nutrients from one  
163 node to another by some process like feeding, and the edge weight can indicate the  
164 amount of energy or mass in the transaction (Baird and Ulanowicz, 1989; Dame and  
165 Patten, 1981). Nodes also can be weighted (e.g. size of individual, population size,  
166 biomass of a given species). Lastly, network models are flexible enough to accommo-  
167 date variation in edge types and relationships among edges (e.g. hypergraphs), but  
168 analysis of these more complicated models is challenging and has only begun to be  
169 applied in ecology (e.g. Golubski et al., 2016).

### 170 **3 Resolving network metrics**

171 The application of network theory defines an explicit mathematical formalism that  
172 provides a potentially unifying set of terms for ecology and its inter-disciplinary  
173 applications (QUINTESENCE Consortium et al., 2016). Ironically, the develop-

174 ment of ecological network metrics has had an opposing affect. One reason for this  
175 is that introductions have occurred in multiple sub-disciplinary branches (Fig. 1B)  
176 (Blüthgen, 2010; Borrett et al., 2014; Carmel et al., 2013). Having separate research  
177 trajectories can facilitate rapid development of ideas and the process of integration  
178 can lead to novel insights (Hodges, 2008). At the same time, these innovations in  
179 network ecology have come at the cost of the “rediscovery” of the same network met-  
180 rics and subsequent description of them with new terms. This has led to different  
181 metrics with similar purposes existing in separate areas of ecology (Table 1).

182 Ecological studies using network approaches draw from a deep well of general net-  
183 work theory (Newman, 2003, 2006; Strogatz, 2001). Ecologists broadly use network  
184 concepts, techniques, and tools to: (1) characterize the system organization (Borrett,  
185 2013; Croft et al., 2004; Ulanowicz, 1986); (2) investigate the consequences of the  
186 network organization (Borrett et al., 2006; Dunne et al., 2002; Grilli et al., 2016); and  
187 (3) identify the processes or mechanisms that might generate the observed patterns  
188 (Allesina and Pascual, 2008; Fath et al., 2007; Guimarães et al., 2007; Poisot et al.,  
189 2016*b*; Ulanowicz et al., 2014; Williams and Martinez, 2000). The unnecessary pro-  
190 liferation of network metrics is exemplified by “connectance” ( $C$ ), which is used by  
191 food-web ecologists to mean the ratio of the number of edges in the network divided  
192 by the total number of possible edges. Elsewhere in the network science literature,  
193 this measurement is referred to as network density (Newman et al., 2001). As an-  
194 other example, what ecosystem ecologists have described as “average path length”  
195 (total system through-flow divided by the total system input) (Finn, 1976) also has  
196 been called network aggradation (Jørgensen et al., 2000). In economics, average path  
197 length is known as the multiplier effect (Samuelson, 1948).

198 Another kind of redundancy is the creation and use of multiple statistics that  
199 measure the same or very similar network aspects. A clear example of this is inher-  
200 ent in the proliferation of centrality measures to indicate node or edge importance.  
201 Network scientists have shown that many centrality metrics are correlated (Jordán  
202 et al., 2007; Newman, 2006; Valente et al., 2008). Likewise, Borrett and Osidele  
203 (2007) found that nine commonly reported ecosystem network analysis metrics co-  
204 varied in 90 plausible parameterizations of a model of phosphorus biogeochemical  
205 cycling for Lake Lanier, GA, but that all these metrics were associated strongly with  
206 only two underlying factors. However, even a perfect correlation does not mean  
207 that two metrics have identical properties, and they still may diverge in different  
208 models. Therefore, it is important to have mathematically based comparisons of  
209 metrics (Borgatti and Everett, 2006; Borrett, 2013; Kazanci and Ma, 2015; Ludovisi  
210 and Scharler, 2017). It is incumbent on network ecologists to establish clearly the  
211 independence and uniqueness of the descriptive metrics used.

212 From the perspective of the broader field of ecology, the proliferation of con-  
213 cepts, terms, and metrics is not a new issue (e.g. Ellison et al., 2005; Tansley, 1935).  
214 Ecologists have a long history of using network concepts and related models in mul-  
215 tiple subdomains (e.g, metapopulations, matrix population models, community co-  
216 occurrence models, ecosystems) without fully recognizing or capitalizing on the sim-  
217 ilarities of the underlying models. Each subdomain has constructed its own concepts  
218 and methods (occasionally borrowing from other areas), and established its own jar-  
219 gon that impedes scientific development. Previous suggestions for solving this issue  
220 have focused on maintaining an historical perspective of ecology (Graham and Day-  
221 ton, 2002); Blüthgen et al. (2008) is an excellent example of how this can be done  
222 through peer-reviewed literature.

223 One possible approach that would go beyond such a diffuse, literature-centered  
224 approach would be to develop a formal ontology of concepts and metrics. An on-  
225 tology is a a set of related terms that are formally defined and supported by as-  
226 sertions (Bard and Rhee, 2004). An ontology therefore provides a framework for  
227 developing concepts within a discipline and presents the opportunity for more ef-  
228 ficient synthesis across disciplinary boundaries. The concept of an ontology is not  
229 new, but more rapid sharing of ontologies and their collaborative development have  
230 been enabled by the Internet. For example, the Open Biological Ontologies (OBO,  
231 <http://www.obofoundry.org>) supports the creation and sharing of ontologies over  
232 the web. Currently, there is no OBO for a “network ecology metric” ontology, and  
233 as far as we are aware, ontologies have yet to be explored or developed for network  
234 metrics.

235 The OBO could provide a platform for harmonizing ecological network metrics,  
236 terms, and concepts. Key obstacles to such harmonization include a requirement that  
237 network ecologists work within a common framework, and the need for an individual  
238 or leadership team to periodically curate the ontology based on new developments in  
239 the field. In determining the best course of action, network ecologists could follow the  
240 example of how similar OBO projects have been managed in the past. The *FOODON*  
241 food role ontology project (<http://www.obofoundry.org/ontology/foodon.html>)  
242 contains information about “materials in natural ecosystems and food webs as well  
243 as human-centric categorization and handling of food.” It could serve as an example  
244 or even the basis of a ecological network metric ontology.

## 245 4 Benchmarking: Trusting our models of mecha- 246 nisms

247 Inferences about processes in ecological systems have relied in part on the application  
248 of simulation models that generate matrices with predictable properties. As discussed  
249 in the previous section, the proliferation of network metrics points to the need for  
250 the investigation and comparison of how these metrics will behave in the context  
251 of different modeling algorithms. Once a metric or algorithm has been chosen, it  
252 is tempting apply them widely to empirical systems to detect patterns, but before  
253 research proceeds, a process of “benchmarking” with artificial matrices that have  
254 predefined amounts of structure and randomness should be used to examine the  
255 behavior of the algorithms and the metrics that are applied to them.

256 Benchmarking of ecological models developed from null model analysis in com-  
257 munity ecology (Atmar and Patterson, 1993; Connor and Simberloff, 1979; Gotelli  
258 and Ulrich, 2012). Null models are specific examples of randomization or Monte  
259 Carlo tests (Manly, 2007) that estimate a frequentist  $P$  value, the tail probability  
260 of obtaining the value of some metric if the null hypothesis were true (Gotelli and  
261 Graves, 1996). The aim of a null model is to determine if the structure of an observed  
262 ecological pattern in space or time is incongruous with what would be expected given  
263 the absence of a causal mechanism. A metric of structure calculated for a single em-  
264 pirical data set is compared to the distribution of the same metric calculated for a  
265 collection of a large number of randomizations of the empirical data set. The data  
266 are typically randomized by reshuffling some elements while holding other elements  
267 constant to incorporate realistic constraints. Comparison with a suite of null models  
268 in which different constraints are systematically imposed or relaxed may provide a  
269 better understanding of the factors that contribute most to patterns in the network  
270 (see Box 1). However, the devil remains in the details and there are also a variety  
271 of ways to randomize data and impose constraints to construct a useful null model.  
272 If the null model is too simplistic, such as a model in which edges and nodes are  
273 sampled with uniform probability, it will always be rejected and provide little insight  
274 into important ecological patterns, regardless of what metric is used. At the other  
275 extreme, if the null model incorporates too many constraints from the data, it will  
276 be difficult or impossible to reject the null hypothesis, even though the network may  
277 contain interesting structure.

278 In network theory, the Erdos-Renyi (ER, (Erdős and Rényi, 1959)) model is a  
279 now-classic example of a model used to generate networks via a random process  
280 for creating matrix structure. The ER model is a random graph that starts with an  
281  $N \times N$  adjacency matrix of nodes and assigns to it  $K$  edges between randomly chosen



282 pairs of nodes. The ER model has been applied in ecology to address questions about  
283 the relationship between stability and complexity (May, 1972) and the structure of  
284 genetic networks (Kauffman et al., 2003). For example, randomized networks have  
285 been used to link motifs (Milo et al., 2002) to network assembly (Baiser et al., 2016),  
286 stability (Allesina and Pascual, 2008; Borrelli et al., 2015), and persistence in food  
287 webs (Stouffer and Bascompte, 2010).

288 In addition to the random matrix approaches of null and ER models, there are  
289 other, more complex algorithms that are used to generate structured matrices. Per-  
290 haps one of the best known in network theory is the Barabasi-Albert (BA, Barabási  
291 and Albert 1999) model, which adds nodes and edges to a growing network with  
292 a greater probability of adding edges to nodes with a higher degree. The BA algo-  
293 rithm is similar to ecological network algorithms that generate non-random structure,  
294 because of either direct influence or similar processes operating in systems of inter-  
295 est. Some of these models include processes of “preferential attachment” in which  
296 organisms tend to interact with the same, common species. Food-web modeling algo-  
297 rithms also have been developed that use a trait-based approach (e.g. Allesina and  
298 Pascual, 2009), consumer-resource models (Yodzis and Innes, 1992), niches (Williams  
299 and Martinez, 2000), cyber-ecosystem algorithms (Fath, 2004), and cascade models  
300 (Allesina and Pascual, 2009; Allesina and Tang, 2012; Cohen and Luczak, 1992).

301 The statistical behavior of some models and metrics can be understood ana-  
302 lytically. For example, the networks generated by the BA algorithm display degree  
303 distributions that approximate a power-law distribution, like many real-world “scale-  
304 free” networks (Albert et al., 2002). If the network is sparse (i.e.  $(K \ll N^2)$ ), the  
305 degree distribution of the network should follow a Poisson distribution. However, as  
306 new models and metrics are introduced, new benchmarking should be done and com-  
307 pared to previous results. Newman et al. (2016) is one example of how benchmarking  
308 can be used for investigating processes operating on ecological networks. Ludovisi  
309 and Scharler (2017) advocate the same approach for the analysis of network models  
310 in general. The `benchmark` (Eugster and Leisch, 2008) package in R (R Core Team,  
311 2017) is a general algorithm-testing software package that provides a useful starting  
312 point.

## 313 **5 Reproducibility: Open-data, Open-source and** 314 **Provenance**

315 As analyses of network models increase in computational intensity, there is a concomi-  
316 tant increase in the need for new tools to track and share key computational details.

317 This need is compounded when models incorporate data from multiple sources or  
318 analyses involve random processes. The combination of the volume of data and com-  
319 putational intensity of studies of ecological networks further increases the burden on  
320 ecologists to provide information needed to adequately reproduce datasets, analyses,  
321 and results. As the sharing and reproducibility of scientific studies are both essential  
322 for advances to have lasting impact, finding easier, faster, and generally more conve-  
323 nient ways to record and report relevant information for ecological network studies  
324 is imperative for advancing the field.

325 Sharing data and open-source code have become established in ecology, and net-  
326 work ecologists are now producing more network models and data (e.g. Fig. 1A).  
327 These include not only ecological interaction networks, but also an influx of other rele-  
328 vant networks, including ecological genomic networks generated by next-generation,  
329 high-throughput sequencing technologies (Langfelder and Horvath, 2008; Zinkgraf  
330 et al., 2017). There are now multiple web-accessible scientific databases (e.g. NCBI,  
331 Data Dryad, Dataverse) and at least four databases have been constructed specifically  
332 to curate ecological network data: including “Kelpforest” (Beas-Luna et al., 2014),  
333 “The Web of Life” (Fortuna et al., 2014), “Mangal” ecological network database  
334 (Poisot et al., 2015) and the “Interaction Web Database” ([https://www.nceas.  
335 ucsb.edu/interactionweb/resources.html](https://www.nceas.ucsb.edu/interactionweb/resources.html)).

336 The increase in ecological network data is linked to an increasing rate of shared  
337 analytical code and other open-source software. It is now commonplace for ecologists  
338 to have a working knowledge of one or more programming languages, such as R,  
339 Python, SAS, MatLab, Mathematica, or SPSS. Multiple software packages exist for  
340 doing ecological analyses, including ecological network analyses. In addition to the  
341 general network analysis packages available in R, there are at least two packages  
342 aimed specifically at ecological network analysis: `bipartite` and `enR`. The former  
343 provides functions drawn largely from community ecology (Dormann et al., 2009),  
344 whereas the latter provides a suite of algorithms developed in the ecosystem network  
345 analysis literature (Borrett and Lau, 2014; Lau et al., 2015).

346 Although, ecology has long had a culture of keeping records of important re-  
347 search details, such as field and lab notebooks, these practices put all of the burden  
348 of recording “metadata” on the researcher. Manual record-keeping methods, even  
349 when conforming to metadata standards (Boose et al., 2007, e.g. EML, see), do not  
350 take advantage of the power of the computational environment. Data-provenance  
351 methods aim to provide a means to collect formalized information about computa-  
352 tional processes, ideally in a way that aids the reproducibility of studies with minimal  
353 impact on the day-to-day activities of researchers (Boose et al., 2007). These tech-  
354 niques have been applied in other areas of research and could provide an effective

355 means for documenting the source and processing of data from the raw state into a  
356 model (Boose and Lerner, 2017).

357 The reproducibility of scientific studies is imperative for advances to have last-  
358 ing impact through the independent verification of results. Although this has been  
359 an ongoing topic of discussion in ecology (Ellison, 2010; Parker et al., 2016), the  
360 need was highlighted by a recent survey finding issues with reproduction of stud-  
361 ies across many scientific disciplines (Baker, 2016). There is significant motivation  
362 from within the ecological community to move toward providing detailed informa-  
363 tion about computational workflows for both repeatability and reproducibility, which  
364 includes repetition by the original investigator (Lowndes et al., 2017). It is also im-  
365 portant in network ecology for data sources and methods for model construction  
366 be standardized and transparent, and that models be curated and shared (McNutt  
367 et al., 2016).

368 Collecting details, such as those enabled by data-provenance capture software, is  
369 one innovative way forward. These tools have been developing in the computer-  
370 science domain for decades; however, only recently have they gained a foothold  
371 in ecology (Boose et al., 2007; Ellison, 2010) or the broader scientific community.  
372 Although there are many challenges in the development and application of data-  
373 provenance principles, multiple software packages do exist for collecting data prove-  
374 nance in the context of scientific investigations. Two provenance capture packages  
375 exist in R, the `recordr` package associated with the DataOne repository (Cao et al.,  
376 2016) and `RDataTracker` (Lerner and Boose, 2014). In addition, although they do  
377 not collect formal data provenance, there are methods developed for “literate com-  
378 puting” that help to collect code along with details about the code and the intention  
379 of the analyses (e.g., the Jupyter notebook project: (Shen and Barabasi, 2014)).

380 For ecological networks, there is software that captures the “data pedigree” of  
381 food-web models, but it does not capture data provenance. Data pedigree was ini-  
382 tially implemented in the EcoPath food-web modeling package (Guesnet et al., 2015;  
383 Heymans et al., 2016) to define confidence intervals and precision estimates for net-  
384 work edges. It has been developed further to allow for the use of informative priors  
385 in Bayesian modeling of ecological networks. This is done by linking models to the  
386 literature sources from which estimates were derived, an approach that is similar  
387 to incorporating metadata information within databases of ecological networks. Al-  
388 though this approach focuses only on a subcomponent of provenance, this still is a  
389 promising way to address the issue that networks, network metrics, and simulation  
390 models used to analyze them commonly assume a lack of uncertainty (*cf.* Borrett  
391 and Osidele, 2007; Kauffman et al., 2003; Kones et al., 2009), and typically ignore  
392 inaccuracy in the empirical data (Ascough et al., 2008; Gregr and Chan, 2014).

## 393 6 Moving Forward

394 Development and application of new technologies (e.g. sequencing methods and com-  
395 putational, data-driven approaches) have the potential to increase both the abun-  
396 dance and quality of ecological networks. For the future development of network  
397 ecology, there is a pressing need not only to share data and code, but also to integrate  
398 and use the large amounts of information enabled by technological advances. For ex-  
399 ample, synthetic networks (i.e. networks merging models from different studies, and  
400 *sensu* Poisot et al., 2016a) are a promising new direction; however, the structural  
401 properties of synthetic networks and the behavior of network metrics applied to them  
402 will require careful investigation, including the application of systematic benchmark-  
403 ing. Multi-trophic networks provide a precedence for these studies to move forward,  
404 but synthesizing models from across many different sources produces new challenges  
405 for developing and benchmarking metrics, as well as an opportunity for new tech-  
406 nologies, like data provenance, to help establish better connections among studies  
407 and researchers.

408 The burgeoning of “open” culture in the sciences (Hampton et al., 2014) also has  
409 the potential to serve as a resource for models and a clearinghouse for resolving the  
410 validity of metrics, models, and algorithms. First, because code is openly shared,  
411 functions used to calculate metrics are open for inspection and, if coded and docu-  
412 mented clearly using software “best-practices” (e.g. Noble, 2009; Visser et al., 2015),  
413 the code provides a transparent documentation of how a metric is implemented and  
414 its computational similarity to other metrics. Second, enabled by the ability to write  
415 their own functions and code, researchers can do numerical investigations of the sim-  
416 ilarities among metrics. Through comparison of metrics calculated on the same or  
417 similar network models, a researcher could at least argue, for a given set of models,  
418 that two or more metrics produce similar results. Third, data provenance provides a  
419 useful tool to aide in the dissemination and synthesis of network models and increases  
420 the reproducibility of ecological network studies, including those documenting new  
421 metrics and benchmarking those metrics and associated algorithms for generating or  
422 analyzing empirical models. Last, as with data provenance, formalizing ecological  
423 network metrics and concepts requires a mathematically rigorous foundation that is  
424 developed by the community of researchers working along parallel lines of inquiry.  
425 Whether this is done through an ontological approach or some other formalized  
426 “clearing-house,” an open process of exchange that integrates multiple perspectives  
427 is essential to prevent the rapid dilution of concepts in ecological network research  
428 as these concepts continue to proliferate, develop and evolve.

429 Over half a century ago, Robert MacArthur published his first paper on the rela-

430 tionship between diversity and stability, initiating multiple research trajectories that  
431 have now become the mainstay of many ecological research programs (MacArthur,  
432 1955). The theory that MacArthur applied was based on flows of energy through  
433 networks of interacting species. Thus, network theory is at the roots of one of the  
434 most widely studied topics in ecology and is now a part of the broader context of  
435 integration across many scientific disciplines that is aimed at consilience of theory  
436 (Wilson, 1999). The synthesis of ecological concepts through the mathematically  
437 rigorous “lingua franca” of network terminology has the potential to unify theories  
438 across disciplines. As with previous concepts (e.g. keystone species, foundation  
439 species, ecosystem engineer), greater clarity and less redundancy will come about  
440 as network methods are used more commonly and researchers compare the mathe-  
441 matical and computational underpinnings of the metrics that they are using. With  
442 the increased use of these approaches, the network concept has and will continue to  
443 serve as a common model that transcends disciplines and has the potential to serve  
444 as an inroad for new approaches. With thoughtful dialogue across sub-disciplines  
445 and among research groups, further infusion of network theory and methods will  
446 continue to advance ecology.

## 447 **References**

- 448 Albert, R., A. L. Barabasi, and A.-L. Barabási. 2002. Statistical mechan-  
449 ics of complex networks. *Reviews of Modern Physics* **74**:47–97. URL <http://journals.aps.org/rmp/abstract/10.1103/RevModPhys.74.47><http://dx.doi.org/10.1103/RevModPhys.74.47>`{\textbackslash}`npapers2:  
450 <http://dx.doi.org/10.1103/RevModPhys.74.47>  
451 [//publication/doi/10.1103/RevModPhys.74.47](http://publication/doi/10.1103/RevModPhys.74.47).
- 452
- 453 Allesina, S., and M. Pascual. 2008. Network structure, predatorprey modules, and  
454 stability in large food webs. *Theoretical Ecology* **1**:55–64. URL <http://www.springerlink.com/index/10.1007/s12080-007-0007-8>.
- 455
- 456 Allesina, S., and M. Pascual. 2009. Food web models: A plea for groups. *Ecology*  
457 *Letters* **12**:652–662.
- 458
- 459 Allesina, S., and S. Tang. 2012. Stability criteria for complex ecosystems. *Nature*  
**483**:205–8. URL <http://dx.doi.org/10.1038/nature10832>.
- 460
- 461 Ascough, J., H. Maier, J. Ravalico, and M. Strudley. 2008. Future research chal-  
lenges for incorporation of uncertainty in environmental and ecological decision-

- 462 making. *Ecological Modelling* **219**:383–399. URL <http://www.sciencedirect.com/science/article/pii/S0304380008003554>.
- 463
- 464 Atmar, W., and B. D. Patterson. 1993. The measure of order and disorder in  
465 the distribution of species in fragmented habitat. *Oecologia* **96**:373–382. URL  
466 <http://link.springer.com/10.1007/BF00317508>.
- 467 Baird, D., and R. E. Ulanowicz. 1989. The seasonal dynamics of the Chesapeake  
468 Bay ecosystem. *Ecological Monographs* **59**:329–364.
- 469 Baiser, B., R. Elhessa, and T. Kahveci. 2016. Motifs in the assembly of food web  
470 networks. *Oikos* **125**:480–491. URL <http://dx.doi.org/10.1111/oik.02532>.
- 471 Baiser, B., J. L. Lockwood, D. La Puma, and M. F. J. Aronson. 2008. A per-  
472 fect storm: two ecosystem engineers interact to degrade deciduous forests of New  
473 Jersey. *Biological Invasions* **10**:785–795. URL <http://link.springer.com/10.1007/s10530-008-9247-9>.
- 474
- 475 Baker, M. 2016. 1,500 scientists lift the lid on reproducibility. *Nature* **533**:452–454.  
476 URL <http://www.nature.com/doifinder/10.1038/533452a>.
- 477 Barabási, A.-L., and R. Albert. 1999. Emergence of scaling in random networks.  
478 *Science* **286**:509–512.
- 479 Barabási, A.-L., R. Albert, and H. Jeong. 2000. Scale-free characteristics of random  
480 networks: the topology of the world-wide web. *Physica A: statistical mechanics*  
481 *and its applications* **281**:69–77.
- 482 Bard, J. B. L., and S. Y. Rhee. 2004. Ontologies in biology: design, applications  
483 and future challenges. *Nature Reviews Genetics* **5**:213–222. URL <http://www.nature.com/doifinder/10.1038/nrg1295>.
- 484
- 485 Bascompte, J. 2010. Ecology. Structure and dynamics of ecological networks. *Science*  
486 (New York, N.Y.) **329**:765–6. URL [http://www.sciencemag.org/content/329/](http://www.sciencemag.org/content/329/5993/765.short)  
487 [5993/765.short](http://www.sciencemag.org/content/329/5993/765.short).
- 488 Bascompte, J., and P. Jordano. 2007. Plant-Animal Mutualistic Networks: The Ar-  
489 chitecture of Biodiversity. *Annual Review of Ecology, Evolution, and Systematics*  
490 **38**:567–593.
- 491 Bascompte, J., and P. Jordano. 2014. Mutualistic networks. Princeton University  
492 Press.

- 493 Beas-Luna, R., M. Novak, M. H. Carr, M. T. Tinker, A. Black, J. E. Caselle,  
494 M. Hoban, D. Malone, and A. Iles. 2014. An online database for informing  
495 ecological network models: <http://kelpforest.ucsc.edu>. *PloS one* **9**:e109356. URL  
496 <http://dx.plos.org/10.1371/journal.pone.0109356>.
- 497 Blüthgen, N. 2010. Why network analysis is often disconnected from community ecol-  
498 ogy: A critique and an ecologist's guide. *Basic and Applied Ecology* **11**:185–195.  
499 URL <http://linkinghub.elsevier.com/retrieve/pii/S1439179110000125>.
- 500 Blüthgen, N., J. Fründ, D. P. Vázquez, and F. Menzel. 2008. WHAT DO INTERAC-  
501 TION NETWORK METRICS TELL US ABOUT SPECIALIZATION AND BI-  
502 OLOGICAL TRAITS. *Ecology* **89**:3387–3399. URL <http://www.esajournals.org/doi/abs/10.1890/07-2121.1>.
- 504 Bonacich, P., 1987. Power and Centrality: A Family of Measures.
- 505 Boose, E. R., A. M. Ellison, L. J. Osterweil, L. a. Clarke, R. Podorozhny, J. L. Hadley,  
506 A. Wise, and D. R. Foster. 2007. Ensuring reliable datasets for environmental  
507 models and forecasts. *Ecological Informatics* **2**:237–247.
- 508 Boose, E. R., and B. S. Lerner, 2017. Replication of data analyses: provenance in R.
- 509 Borgatti, S. P., and M. G. Everett. 2006. A Graph-theoretic perspective on centrality.  
510 *Social Networks* **28**:466–484. URL [http://www.sciencedirect.com/science/](http://www.sciencedirect.com/science/article/pii/S0378873305000833)  
511 [article/pii/S0378873305000833](http://www.sciencedirect.com/science/article/pii/S0378873305000833).
- 512 Borrelli, J. J., S. Allesina, P. Amarasekare, R. Arditi, I. Chase, J. Damuth, R. D.  
513 Holt, D. O. Logofet, M. Novak, R. P. Rohr, A. G. Rossberg, M. Spencer, J. K.  
514 Tran, and L. R. Ginzburg. 2015. Selection on stability across ecological scales.  
515 *Trends in Ecology & Evolution* **30**:417–425.
- 516 Borrett, S. R. 2013. Throughflow centrality is a global indicator of the functional  
517 importance of species in ecosystems. *Ecological Indicators* **32**:182–196. URL [http://](http://dx.doi.org/10.1016/j.ecolind.2013.03.014)  
518 [dx.doi.org/10.1016/j.ecolind.2013.03.014](http://dx.doi.org/10.1016/j.ecolind.2013.03.014).
- 519 Borrett, S. R., W. Bridewell, P. Langely, and K. R. Arrigo. 2006. A method for  
520 representing and developing process models. *Ecological Complexity* **4**:28. URL  
521 <http://arxiv.org/abs/q-bio/0605025>.
- 522 Borrett, S. R., R. R. Christian, and R. E. Ulanowicz, 2012. Network Ecol-  
523 ogy (Revised). Pages 1767–1772 *in* A. El-Shaarawi and W. Piegorsch, editors.

- 524 Encyclopedia of Environmetrics (2nd edition). John Wiley and Sons, Chinch-  
525 ester, second edition. URL [http://people.uncw.edu/borretts/documents/](http://people.uncw.edu/borretts/documents/BorrettChristianUlanowicz2012NetworkEcology.pdf)  
526 [BorrettChristianUlanowicz2012NetworkEcology.pdf](http://people.uncw.edu/borretts/documents/BorrettChristianUlanowicz2012NetworkEcology.pdf).
- 527 Borrett, S. R., B. D. Fath, and B. C. Patten. 2007. Functional integration of  
528 ecological networks through pathway proliferation. *J. Theor. Biol.* **245**:98–111.
- 529 Borrett, S. R., and M. K. Lau. 2014. {enaR}: An {R} package for Ecosystem  
530 Network Analysis. *Methods in Ecology and Evolution* **11**:1206–1213.
- 531 Borrett, S. R., J. Moody, and A. Edelman. 2014. The rise of Network Ecology: Maps  
532 of the topic diversity and scientific collaboration. *Ecological Modelling* page 18.  
533 URL <http://arxiv.org/abs/1311.1785>.
- 534 Borrett, S. R., and O. O. Osidele. 2007. Environ indicator sensitivity to flux un-  
535 certainty in a phosphorus model of Lake Sidney Lanier, USA. *Ecological Mod-*  
536 *elling* **200**:371–383. URL [http://www.sciencedirect.com/science/article/](http://www.sciencedirect.com/science/article/B6VBS-4M57HDN-2/2/eeeeed79df4b4a4d4787c2ce6f3089af6)  
537 [B6VBS-4M57HDN-2/2/eeeeed79df4b4a4d4787c2ce6f3089af6](http://www.sciencedirect.com/science/article/B6VBS-4M57HDN-2/2/eeeeed79df4b4a4d4787c2ce6f3089af6).
- 538 Borrvall, C., B. Ebenman, and T. Jonsson, 2000. Biodiversity lessens the risk of  
539 cascading extinction in model food webs.
- 540 Brandes, U., T. Erlebach, and Gesellschaft fur Informatik. 2005. Network analysis :  
541 methodological foundations. Springer.
- 542 Brandes, U., G. Robins, A. McCranie, and S. Wasserman. 2013. What is network  
543 science? *Network Science* **1**:1–15.
- 544 Calabrese, J. M., and W. F. Fagan. 2004. A comparison-shopper’s guide to connec-  
545 tivity metrics. *Frontiers in Ecology and the Environment* **2**:529–536. URL [http://](http://doi.wiley.com/10.1890/1540-9295(2004)002[0529:ACGTCM]2.0.CO;2)  
546 [doi.wiley.com/10.1890/1540-9295\(2004\)002\[0529:ACGTCM\]2.0.CO;2](http://doi.wiley.com/10.1890/1540-9295(2004)002[0529:ACGTCM]2.0.CO;2).
- 547 Cao, Y., C. Jones, V. Cuevas-Vicentín, M. B. Jones, B. Ludäscher, T. McPhillips,  
548 P. Missier, C. Schwalm, P. Slaughter, D. Vieglais, L. Walker, and Y. Wei,  
549 2016. DataONE: A Data Federation with Provenance Support. Pages 230–234  
550 . Springer International Publishing. URL [http://link.springer.com/10.1007/](http://link.springer.com/10.1007/978-3-319-40593-3_{\_}28)  
551 [978-3-319-40593-3\\_{\\\_}28](http://link.springer.com/10.1007/978-3-319-40593-3_{\_}28).
- 552 Carmel, Y., R. Kent, A. Bar-Massada, L. Blank, J. Liberzon, O. Nezer, G. Sapir, and  
553 R. Federman. 2013. Trends in ecological research during the last three decades—a  
554 systematic review. *PloS one* **8**:e59813.



- 555 Cherrett, J. M., 1989. Key concepts: The results of a survey of our members'  
556 opinions. Pages 1–16 in J. M. Cherrett, A. D. Bradshaw, F. B. Goldsmith, P. G.  
557 Grubb, and J. R. Krebs, editors. *Ecological concepts: The contribution of ecology*  
558 *to an understanding of the natural world*. Blackwell Scientific Publications, Oxford,  
559 UK.
- 560 Cohen, J. E., and T. Łuczak. 1992. Trophic levels in community food webs.  
561 *Evolutionary Ecology* **6**:73–89. URL [http://link.springer.com/10.1007/  
562 BF02285335](http://link.springer.com/10.1007/BF02285335).
- 563 Colwell, R. K., and D. W. Winkler. 1984. *A null model for null models in biogeog-*  
564 *raphy*. Princeton University Press.
- 565 Connor, E. F., and D. Simberloff. 1979. The Assembly of Species Communi-  
566 ties: Chance or Competition? *Ecology* **60**:1132. URL [http://www.jstor.org/  
567 stable/1936961?origin=crossref&GotoISI://A1979JS62200008](http://www.jstor.org/stable/1936961?origin=crossref&GotoISI://A1979JS62200008).
- 568 Council, N. R. 2003. *Neon*. National Academies Press, Washington, D.C. URL  
569 <http://www.nap.edu/catalog/10807>.
- 570 Creamer, R., S. Hannula, J. Van Leeuwen, D. Stone, M. Rutgers, R. Schmelz,  
571 P. De Ruiter, N. B. Hendriksen, T. Bolger, M.-L. Bouffaud, et al. 2016. Eco-  
572 logical network analysis reveals the inter-connection between soil biodiversity and  
573 ecosystem function as affected by land use across Europe. *Applied Soil Ecology*  
574 **97**:112–124.
- 575 Croft, D. P., J. Krause, and R. James. 2004. Social networks in the guppy  
576 (*Poecilia reticulata*). *Proc. Royal Soc. Lond. B.* **271**:S516–S519.
- 577 Dame, R. F., and B. C. Patten. 1981. Analysis of energy flows in an intertidal oyster  
578 reef. *Marine Ecology Progress Series* **5**:115–124. URL [http://www.int-res.com/  
579 articles/meps/5/m005p115.pdf](http://www.int-res.com/articles/meps/5/m005p115.pdf).
- 580 Dayton, P. K. 1972. Toward an understanding of community resilience and the  
581 potential effects of enrichment to the benthos at McMurdo Sound, Antarctica.  
582 *Proceedings of the Colloquium on Conservation Problems in Antarctica* pages 81–  
583 96. URL <http://daytonlab.ucsd.edu/Publications/Pubs.htm>.
- 584 Dormann, C. F., C. F. Dormann, J. Fründ, N. Blüthgen, and B. Gruber. 2009.  
585 Indices, Graphs and Null Models: Analyzing Bipartite Ecological Networks.  
586 *Open Ecology Journal* **2**:7–24. URL [http://citeseerx.ist.psu.edu/viewdoc/  
587 summary?doi=10.1.1.323.9930](http://citeseerx.ist.psu.edu/viewdoc/summary?doi=10.1.1.323.9930).

- 588 Dubois, M., V. Rossi, E. Ser-Giacomi, S. Arnaud-Haond, C. López, and  
589 E. Hernández-García. 2016. Linking basin-scale connectivity, oceanography and  
590 population dynamics for the conservation and management of marine ecosystems.  
591 *Global Ecology and Biogeography* .
- 592 Dunne, J. a., R. J. Williams, and N. D. Martinez. 2002. Network structure and  
593 biodiversity loss in food webs: Robustness increases with connectance. *Ecology*  
594 *Letters* **5**:558–567.
- 595 Eklöf, A., and B. Ebenman. 2006. Species loss and secondary extinctions in simple  
596 and complex model communities. *Journal of Animal Ecology* **75**:239–246.
- 597 Eklöf, A., M. R. Helmus, M. Moore, and S. Allesina. 2012. Relevance of evolutionary  
598 history for food web structure. *Proceedings. Biological sciences / The Royal So-*  
599 *cietty* **279**:1588–96. URL [http://rspb.royalsocietypublishing.org/content/](http://rspb.royalsocietypublishing.org/content/early/2011/11/10/rspb.2011.2149.full)  
600 [early/2011/11/10/rspb.2011.2149.full](http://rspb.royalsocietypublishing.org/content/early/2011/11/10/rspb.2011.2149.full).
- 601 Ellison, A. M. 2010. Repeatability and transparency in ecological research. *Ecology*  
602 **91**:2536–2539.
- 603 Ellison, A. M., M. S. Bank, B. D. Clinton, E. A. Colburn, K. Elliott, C. R. Ford, D. R.  
604 Foster, B. D. Kloeppel, J. D. Knoepp, G. M. Lovett, J. Mohan, D. A. Orwig, N. L.  
605 Rodenhouse, W. V. Sobczak, K. A. Stinson, J. K. Stone, C. M. Swan, J. Thompson,  
606 B. Von Holle, and J. R. Webster. 2005. Loss of foundation species: consequences  
607 for the structure and dynamics of forested ecosystems. *Frontiers in Ecology and*  
608 *the Environment* **3**:479–486. URL [http://www.esajournals.org/doi/abs/10.](http://www.esajournals.org/doi/abs/10.1890/1540-9295(2005)003[0479:LOFSCF]2.0.CO;2?journalCode=fron)  
609 [1890/1540-9295\(2005\)003\[0479:LOFSCF\]2.0.CO;2?journalCode=fron](http://www.esajournals.org/doi/abs/10.1890/1540-9295(2005)003[0479:LOFSCF]2.0.CO;2?journalCode=fron).
- 610 Erdős, P., and a. Rényi. 1959. On random graphs. *Publicationes Mathematicae*  
611 **6**:290–297.
- 612 Estrada, E., 2015. Introduction to Complex Networks: Structure and Dynamics.  
613 Pages 93–131 . Springer International Publishing. URL [http://link.springer.](http://link.springer.com/10.1007/978-3-319-11322-7{\_}3)  
614 [com/10.1007/978-3-319-11322-7{\\\_}3](http://link.springer.com/10.1007/978-3-319-11322-7{\_}3).
- 615 Eugster, M. J. A., and F. Leisch, 2008. Bench Plot and Mixed Effects Models: First  
616 Steps toward a Comprehensive Benchmark Analysis Toolbox. Pages 299–306 *in*  
617 P. Brito, editor. *Compstat 2008—Proceedings in Computational Statistics*. Physica  
618 Verlag, Heidelberg, Germany. URL <http://epub.ub.uni-muenchen.de/3206/>.

- 619 Fang, D., B. D. Fath, B. Chen, and U. M. Scharler. 2014. Network environ  
620 analysis for socio-economic water system. *Ecological Indicators* URL [http:  
621 //www.sciencedirect.com/science/article/pii/S1470160X14001976](http://www.sciencedirect.com/science/article/pii/S1470160X14001976).
- 622 Fath, B. D. 2004. Network analysis applied to large-scale cyber-ecosystems. *Ecolog-  
623 ical Modeling* **171**:329–337.
- 624 Fath, B. D., U. M. Scharler, R. E. Ulanowicz, and B. Hannon. 2007. Ecological  
625 network analysis: network construction. *Ecological Modelling* **208**:49–55. URL  
626 <http://www.sciencedirect.com/science/article/pii/S0304380007002517>.
- 627 Finn, J. T. 1976. Measures of ecosystem structure and function derived from analysis  
628 of flows. *Journal of theoretical biology* **56**:363–380.
- 629 Finn, J. T. 1980. Flow analysis of models of the Hubbard Brook ecosystem. *Ecology*  
630 **61**:562–571.
- 631 Fletcher, R. J., A. Revell, B. E. Reichert, W. M. Kitchens, J. D. Dixon, and J. D.  
632 Austin. 2013. Network modularity reveals critical scales for connectivity in ecol-  
633 ogy and evolution. *Nature Communications* **4**. URL [http://www.nature.com/  
634 doi/10.1038/ncomms3572](http://www.nature.com/doi/10.1038/ncomms3572).
- 635 Fortuna, M. A., R. Ortega, and J. Bascompte. 2014. The Web of Life. [www.web-of-  
636 life.es](http://www.web-of-life.es) URL <http://arxiv.org/abs/1403.2575>[www.web-of-life.es](http://www.web-of-life.es).
- 637 Freeman, L. C. 1979. Centrality in networks. I. Conceptual clarificaion. *Social  
638 Networks* **1**:215–239.
- 639 Golley, F. 1993. *A history of the ecosystem concept in ecology: More than the sum  
640 of the parts*. Yale University Press, New Haven, CT.
- 641 Golubski, A. J., E. E. Westlund, J. Vandermeer, and M. Pascual. 2016. Ecological  
642 Networks over the Edge: Hypergraph Trait-Mediated Indirect Interaction (TMII)  
643 Structure. *Trends in Ecology & Evolution* URL [http://www.cell.com/article/  
644 S0169534716000513/fulltext](http://www.cell.com/article/S0169534716000513/fulltext).
- 645 Gotelli, N. J. 2000. Null model analysis of species co-occurrence patterns. *Ecology*  
646 **81**:2606–2621.
- 647 Gotelli, N. J., R. M. Dorazio, A. M. Ellison, and G. D. Grossman. 2010. Detecting  
648 temporal trends in species assemblages with bootstrapping procedures and hierar-  
649 chical models. *Philosophical transactions of the Royal Society of London. Series  
650 B, Biological sciences* **365**:3621–3631.

- 651 Gotelli, N. J., A. M. Ellison, and B. A. Ballif. 2012. Environmental proteomics, biodi-  
652 versity statistics and food-web structure. *Trends in ecology & evolution* **27**:436–42.  
653 URL [/pmcc/articles/PMC3392467/?report=abstract](http://pmcc/articles/PMC3392467/?report=abstract).
- 654 Gotelli, N. J., and G. R. Graves. 1996. Null models in ecology. *Ecol-*  
655 *ogy* **14**:368. URL [http://books.google.com/books?id=vjsBAAAACAAJ{\&  
656 }printsec=frontcover](http://books.google.com/books?id=vjsBAAAACAAJ{\& }printsec=frontcover).
- 657 Gotelli, N. J., and W. Ulrich, 2012. Statistical challenges in null model analysis.
- 658 Graham, M. H., and P. K. Dayton. 2002. ON THE EVOLUTION OF  
659 ECOLOGICAL IDEAS: PARADIGMS AND SCIENTIFIC PROGRESS. *Ecol-*  
660 *ogy* **83**:1481–1489. URL [http://doi.wiley.com/10.1890/0012-9658\(2002\)  
661 083\[1481:OTE0EI\]2.0.CO;2](http://doi.wiley.com/10.1890/0012-9658(2002)083[1481:OTE0EI]2.0.CO;2).
- 662 Gregr, E. J., and K. M. A. Chan. 2014. Leaps of Faith: How Implicit Assumptions  
663 Compromise the Utility of Ecosystem Models for Decision-making. *BioScience*  
664 **65**:43–54. URL [http://bioscience.oxfordjournals.org/content/65/1/43.  
665 full](http://bioscience.oxfordjournals.org/content/65/1/43.full).
- 666 Grilli, J., T. Rogers, and S. Allesina. 2016. Modularity and stability in ecological  
667 communities. *Nature Communications* **7**.
- 668 Guesnet, V., G. Lassalle, A. Chaalali, K. Kearney, B. Saint-Béat, B. Karimi,  
669 B. Grami, S. Tecchio, N. Niquil, and J. Lobry. 2015. Incorporating food-web  
670 parameter uncertainty into Ecopath-derived ecological network indicators. *Eco-*  
671 *logical Modelling* **313**:29–40. URL [http://www.sciencedirect.com/science/  
672 article/pii/S0304380015002495](http://www.sciencedirect.com/science/article/pii/S0304380015002495).
- 673 Guimarães, P. R., G. Machado, M. A. M. de Aguiar, P. Jordano, J. Bascompte,  
674 A. Pinheiro, and S. F. Dos Reis. 2007. Build-up mechanisms determining the  
675 topology of mutualistic networks. *Journal of theoretical biology* **249**:181–9. URL  
676 <http://www.ncbi.nlm.nih.gov/pubmed/17889903>.
- 677 Hampton, S. E., S. Anderson, S. C. Bagby, and C. Gries. 2014. The Tao of Open  
678 Science for Ecology. *PeerJ PrePrints* pages 1–30. URL [https://peerj.com/  
679 preprints/549/](https://peerj.com/preprints/549/).
- 680 Heymans, J. J., M. Coll, J. S. Link, S. Mackinson, J. Steenbeek, C. Walters, and  
681 V. Christensen. 2016. Best practice in Ecopath with Ecosim food-web models for  
682 ecosystem-based management. *Ecological Modelling* **331**:173–184.

- 683 Hines, D. E., and S. R. Borrett. 2014. A comparison of network, neighborhood, and  
684 node levels of analyses in two models of nitrogen cycling in the Cape Fear River  
685 Estuary. *Ecological Modelling* **293**:210–220. URL <http://www.sciencedirect.com/science/article/pii/S0304380013005607>.  
686
- 687 Hodges, K. E. 2008. Defining the problem: terminology and progress in ecology.  
688 *Frontiers in Ecology and the Environment* **6**:35–42. URL [http://doi.wiley.com/](http://doi.wiley.com/10.1890/060108)  
689 [10.1890/060108](http://doi.wiley.com/10.1890/060108).
- 690 Hollenberg, D. 2007. On the evolution and dynamics of biological networks. *Rivista*  
691 *di biologia* **100**:93–118. URL <http://www.ncbi.nlm.nih.gov/pubmed/17592821>.
- 692 Holstein, D. M., C. B. Paris, and P. J. Mumby. 2014. Consistency and inconsistency  
693 in multispecies population network dynamics of coral reef ecosystems. *Marine*  
694 *Ecology Progress Series* **499**:1–18.
- 695 Holt, R., 1997. Community modules. Pages 333–349 *in* *Multitrophic interactions in*  
696 *terrestrial ecosystems*, 36th Symposium of the British Ecological Society. Blackwell  
697 Science Oxford.
- 698 Holt, R. D., and M. F. Hoopes. 2005. Food web dynamics in a metacommunity  
699 context. *Metacommunities: Spatial dynamics and ecological communities* pages  
700 68–93.
- 701 Ings, T. C., J. M. Montoya, J. Bascompte, N. Blüthgen, L. Brown, C. F. Dormann,  
702 F. Edwards, D. Figueroa, U. Jacob, J. I. Jones, R. B. Lauridsen, M. E. Ledger,  
703 H. M. Lewis, J. M. Olesen, F. J. F. van Veen, P. H. Warren, and G. Woodward.  
704 2009. Ecological networks—beyond food webs. *The Journal of animal ecology*  
705 **78**:253–69. URL <http://www.ncbi.nlm.nih.gov/pubmed/19120606>.
- 706 Jacoby, D. M. P., and R. Freeman. 2016. Emerging network-based tools in movement  
707 ecology. *Trends in Ecology & Evolution* **31**:301–314.
- 708 Jones, C. G., J. H. Lawton, and M. Shachak. 1994. Organisms as Ecosystem Engi-  
709 neers. *Oikos* **69**:373–386.
- 710 Jordán, F., Z. Benedek, and J. Podani. 2007. Quantifying positional importance in  
711 food webs: A comparison of centrality indices. *Ecological Modelling* **205**:270–275.
- 712 Jørgensen, S. E., B. C. Patten, and M. Straškraba. 2000. Ecosystems emerging: 4.  
713 Growth. *Ecological Modelling* **126**:249–284.

- 714 Kauffman, S., C. Peterson, B. R. Samuelsson, C. Troein, and P. W. Ander-  
715 son. 2003. Random Boolean network models and the yeast transcriptional net-  
716 work. *Proceedings of the National Academy of Sciences* **100**:14796–14799. URL  
717 <http://www.pnas.org/cgi/doi/10.1073/pnas.2036429100>.
- 718 Kazanci, C., and Q. Ma, 2015. Chapter 3 System-wide measures in ecological net-  
719 work analysis. Pages 45–68 *in* Y.-S. Park, S. Lek, C. Baehr, and S. E. Jorgensen,  
720 editors. *Advanced Modelling Techniques Studying Global Changes in Environmen-*  
721 *tal Sciences*, volume 27. Elsevier.
- 722 Kéfi, S., E. L. Berlow, E. A. Wieters, S. A. Navarrete, O. L. Petchey, S. A. Wood,  
723 A. Boit, L. N. Joppa, K. D. Lafferty, R. J. Williams, N. D. Martinez, B. A.  
724 Menge, C. A. Blanchette, A. C. Iles, and U. Brose. 2012. More than a meal{...}  
725 integrating non-feeding interactions into food webs. *Ecology Letters* **15**:291–300.  
726 URL <http://doi.wiley.com/10.1111/j.1461-0248.2011.01732.x>.
- 727 Kones, J. K., K. Soetaert, D. van Oevelen, and J. O. Owino. 2009. Are network  
728 indices robust indicators of food web functioning? A Monte Carlo approach. *Eco-*  
729 *logical Modelling* **220**:370–382. URL [http://www.sciencedirect.com/science/](http://www.sciencedirect.com/science/article/pii/S0304380008005024)  
730 [article/pii/S0304380008005024](http://www.sciencedirect.com/science/article/pii/S0304380008005024).
- 731 Krause, A. E., K. A. Frank, D. M. Mason, R. E. Ulanowicz, and W. W. Taylor.  
732 2003. Compartments revealed in food-web structure. *Nature* **426**:282–5. URL  
733 <http://dx.doi.org/10.1038/nature02115>.
- 734 Langfelder, P., and S. Horvath. 2008. WGCNA: an R package for weighted correlation  
735 network analysis. *BMC bioinformatics* **9**:559.
- 736 Lau, M. K., S. R. Borrett, D. E. Hines, and P. Singh, 2015. enaR: Tools for Ecological  
737 Network Analysis. URL <https://cran.r-project.org/web/packages/enaR/>.
- 738 Layton, A., B. Bras, and M. Weissburg. 2016. Ecological Principles and Metrics  
739 for Improving Material Cycling Structures in Manufacturing Networks. *Journal of*  
740 *Manufacturing Science and Engineering* **138**:101002.
- 741 Lédée, E. J. I., M. R. Heupel, A. J. Tobin, A. Mapleston, and C. A. Simpfendorfer.  
742 2016. Movement patterns of two carangid species in inshore habitats characterised  
743 using network analysis. *Marine Ecology Progress Series* **553**:219–232.
- 744 Legendre, P., L. Legendre, L. Legendre, and P. Legendre. 2012. *Numerical ecology*.  
745 Elsevier.

- 746 Lerner, B., and E. Boose, 2014. RDataTracker: Collecting Provenance in an In-  
747 teractive Scripting Environment. Pages 1–4 *in* 6th USENIX Workshop on the  
748 Theory and Practice of Provenance (TaPP 2014). USENIX Association, Cologne.  
749 URL [https://www.usenix.org/conference/tapp2014/agenda/presentation/  
750 lerner](https://www.usenix.org/conference/tapp2014/agenda/presentation/lerner).
- 751 Lima, M. 2011. Visual Complexity: Mapping Patterns of Information. Princeton  
752 Architectural Press.
- 753 Lindeman, R. L. 1942. The trophic-dynamic aspect of ecology. *Ecology* **23**:399–418.
- 754 Lowndes, J. S. S., B. D. Best, C. Scarborough, J. C. Afflerbach, M. R. Frazier, C. C.  
755 O’Hara, N. Jiang, and B. S. Halpern. 2017. Our path to better science in less  
756 time using open data science tools. *Nature Ecology & Evolution* **1**:0160. URL  
757 <http://www.nature.com/articles/s41559-017-0160>.
- 758 Lubchenco, J., A. M. Olson, L. B. Brubaker, S. R. Carpenter, M. M. Hol-  
759 land, S. P. Hubbell, S. A. Levin, J. A. MacMahon, P. A. Matson, J. M.  
760 Melillo, H. A. Mooney, C. H. Peterson, and H. Ronald Pulliam. 1991. The  
761 Sustainable Biosphere Initiative: An Ecological Research Agenda: A Report  
762 from the Ecological Society of America. *Risser Source: Ecology* **72**:371–412.  
763 URL <http://www.jstor.org/stable/2937183>[http://www.jstor.org/http://  
764 www.jstor.org/action/showPublisher?publisherCode=esa](http://www.jstor.org/http://www.jstor.org/action/showPublisher?publisherCode=esa).
- 765 Ludovisi, A., and U. M. Scharler. 2017. Towards a sounder interpretation of entropy-  
766 based indicators in ecological network analysis. *Ecological Indicators* **72**:726–737.
- 767 MacArthur, R. 1955. Fluctuations of Animal Populations and a Measure of Com-  
768 munity Stability. *Ecology* **36**:533. URL [http://www.readcube.com/articles/  
769 10.2307/1929601](http://www.readcube.com/articles/10.2307/1929601).
- 770 Manly, B. F. J. 2007. Randomization, bootstrap and Monte Carlo methods in  
771 biology. Chapman and Hall. URL [http://www.loc.gov/catdir/toc/fy0702/  
772 2006047407.html](http://www.loc.gov/catdir/toc/fy0702/2006047407.html).
- 773 Margalef, R. 1963. Certain unifying principles in ecology. *The American Naturalist*  
774 **97**:357–374.
- 775 Martinez, N. D., 1992. Constant Connectance in Community Food Webs.

- 776 Maslov, S., and K. Sneppen. 2002. Specificity and stability in topology of protein  
777 networks. *Science* (New York, N.Y.) **296**:910–3. URL <http://www.ncbi.nlm.nih.gov/pubmed/11988575>.  
778
- 779 May, R. M. 1972. Will a Large Complex System be Stable? *Nature* **238**:413–414.  
780 URL <http://dx.doi.org/10.1038/238413a0>.
- 781 May, R. M. 2001. *Stability and Complexity in Model Ecosystems*. Princeton Uni-  
782 versity Press. URL <http://books.google.com/books?hl=en&lr=&id=BDA5-ipCLt4C&pgis=1>.  
783
- 784 May, R. M. 2006. Network structure and the biology of populations. *Trends in ecol-  
785 ogy & evolution* **21**:394–399. URL [http://www.ncbi.nlm.nih.gov/pubmed/  
786 16815438](http://www.ncbi.nlm.nih.gov/pubmed/16815438).
- 787 McNutt, M., K. Lehnert, B. Hanson, B. A. Nosek, A. M. Ellison, and J. L. King.  
788 2016. Liberating field science samples and data. *Science* **351**:1024–1026. URL  
789 <http://science.sciencemag.org/content/351/6277/1024.abstract>.
- 790 Milo, R., S. Shen-Orr, S. Itzkovitz, N. Kashtan, D. Chklovskii, U. Alon, S. H. Stro-  
791 gatz, D. Watts, S. H. Strogatz, A.-L. Barabási, R. Albert, M. Newman, H. Jeong,  
792 B. Tombor, R. Albert, Z. N. Oltvai, A. L. Barabasi, R. F. Cancho, C. Janssen,  
793 R. V. Sole, R. F. Cancho, R. V. Sole, L. Amaral, A. Scala, M. Barthelemy,  
794 H. Stanley, B. Huberman, L. Adamic, S. Shen-Orr, R. Milo, S. Mangan, U. Alon,  
795 N. Guelzim, S. Bottani, P. Bourguine, F. Kepes, M. Newman, S. H. Strogatz,  
796 D. Watts, S. Maslov, K. Sneppen, D. Thieffry, A. M. Huerta, E. Perez-Rueda,  
797 J. Collado-Vides, M. C. Costanzo, R. Williams, N. Martinez, S. Pimm, J. Law-  
798 ton, J. Cohen, J. White, E. Southgate, J. Thomson, S. Brenner, D. Callaway,  
799 J. Hopcroft, J. Kleinberg, M. Newman, and S. H. Strogatz. 2002. Network motifs:  
800 simple building blocks of complex networks. *Science* (New York, N.Y.) **298**:824–7.  
801 URL <http://www.ncbi.nlm.nih.gov/pubmed/12399590>.
- 802 Newman, M. 2010. *Networks an Introduction*. Oxford University  
803 Press. URL [http://www.oxfordscholarship.com/view/10.1093/acprof:oso/  
804 9780199206650.001.0001/acprof-9780199206650](http://www.oxfordscholarship.com/view/10.1093/acprof:oso/9780199206650.001.0001/acprof-9780199206650).
- 805 Newman, M. E. J., 2003. *The Structure and Function of Complex Networks*.
- 806 Newman, M. E. J. 2006. Modularity and community structure in networks. *Pro-  
807 ceedings of the National Academy of Sciences of the United States of America*  
808 **103**:8577–82. URL <http://www.pnas.org/content/103/23/8577.short>.



- 809 Newman, M. E. J., A. Clauset, C. Aicher, A. Z. Jacobs, A. Clauset, S. Fortu-  
810 nato, P. Holme, M. Huss, H. Jeong, R. Guimerà, L. A. N. Amaral, D. Hric,  
811 R. K. Darst, S. Fortunato, M. Barthélemy, A. Z. Jacobs, A. Clauset, K. Zuev,  
812 G. B. M. Boguñá, D. Krioukov, B. H. Good, Y.-A. d. Montjoye, A. Clauset,  
813 C. Bothorel, J. D. Cruz, M. Magnani, B. Micenková, N. Binkiewicz, J. T. Vogel-  
814 stein, K. Rohe, E. Galbrun, A. Gionis, N. Tatti, T. J. Hansen, M. W. Mahoney,  
815 Y. Zhang, E. Levina, J. Zhu, P. Expert, T. S. Evans, V. D. Blondel, R. Lambiotte,  
816 L. Peel, P. Zhang, C. Moore, L. Zdeborová, X. Maa, L. Gaoa, X. Yongb, L. Fua,  
817 Z.-Y. Zhang, P. W. Holland, K. B. Laskey, S. Leinhardt, B. Karrer, M. E. J. New-  
818 man, A. Decelle, F. Krzakala, C. Moore, L. Zdeborová, E. Mossel, J. Neeman,  
819 A. Sly, J. Moody, L. Danon, J. Duch, A. Diaz-Guilera, A. Arenas, A. F. Mc-  
820 Daid, D. Greene, N. Hurley, U. Brose, G. Woodward, A. L. Traud, P. J. Mucha,  
821 M. A. Porter, P. C. Bull, D. B. Larremore, A. Clauset, C. Z. Buckee, D. B.  
822 Larremore, A. Clauset, A. Z. Jacobs, G. M. Warimwe, P. C. Bull, A. Clauset,  
823 C. Moore, M. E. J. Newman, R. Milo, S. P. Borgatti, M. G. Everett, B. Ball,  
824 M. E. J. Newman, P. D. Hoff, A. E. Raferty, and M. S. Handcock. 2016. Struc-  
825 ture and inference in annotated networks. *Nature Communications* **7**:11863. URL  
826 <http://www.nature.com/doifinder/10.1038/ncomms11863>.
- 827 Newman, M. E. J., S. H. Strogatz, and D. J. Watts. 2001. Random graphs with  
828 arbitrary degree distributions and their applications. *Physical Review E* **64**:026118.  
829 URL <http://arxiv.org/abs/cond-mat/0007235/>.
- 830 Noble, W. S. 2009. A quick guide to organizing computational biology projects.  
831 *PLoS computational biology* **5**:e1000424. URL [http://dx.plos.org/10.1371/](http://dx.plos.org/10.1371/journal.pcbi.1000424)  
832 [journal.pcbi.1000424](http://dx.plos.org/10.1371/journal.pcbi.1000424).
- 833 Odum, H. T. 1957. Trophic structure and productivity of Silver Springs, Florida.  
834 *Ecol. Mono.* **27**:55–112.
- 835 Odum, H. T., and R. C. Pinkerton. 1955. Time’s speed regulator: the optimum  
836 efficiency for maximum power output in physical and biological systems. *American*  
837 *Scientist* **43**:331–343.
- 838 Paine, R. T. 1966. Food Web Complexity and Species Diversity. *The American*  
839 *Naturalist* **100**:65.
- 840 Parker, T. H., S. Nakagawa, and J. Gurevitch. 2016. Promoting transparency in  
841 evolutionary biology and ecology. *Ecology Letters* **19**:726–728. URL [http://](http://doi.wiley.com/10.1111/ele.12610)  
842 [doi.wiley.com/10.1111/ele.12610](http://doi.wiley.com/10.1111/ele.12610).

- 843 Patten, B. C. 1978. Systems approach to the concept of environment. *Ohio Journal*  
844 *of Science* **78**:206–222. URL <https://kb.osu.edu/dspace/handle/1811/22549>.
- 845 Patten, B. C., and G. T. Auble. 1981. System theory of the ecological niche. *American*  
846 *Naturalist* **117**:893–922. URL <GotoISI>://BIOABS:BACD198172072401.
- 847 Patten, B. C., and M. Witkamp. 1967. Systems analysis of <sup>134</sup>cesium kinetics in  
848 terrestrial microcosms. *Ecology* **48**:813–824.
- 849 Petanidou, T., A. S. Kallimanis, J. Tzanopoulos, S. P. Sgardelis, and J. D. Pantis.  
850 2008. Long-term observation of a pollination network: Fluctuation in species and  
851 interactions, relative invariance of network structure and implications for estimates  
852 of specialization. *Ecology Letters* **11**:564–575.
- 853 Pimm, S. L. 1982. *Food webs*. Chapman and Hall, London; New York.
- 854 Poisot, T., B. Baiser, J. A. Dunne, S. Kéfi, F. Massol, N. Mouquet, T. N. Ro-  
855 manuk, D. B. Stouffer, S. A. Wood, and D. Gravel. 2015. mangal mak-  
856 ing ecological network analysis simple. *Ecography* pages n/a–n/a. URL <http://onlinelibrary.wiley.com/doi/10.1111/ecog.00976/abstract>.
- 858 Poisot, T., D. Gravel, S. Leroux, S. A. Wood, M.-J. Fortin, B. Baiser, A. R. Cirtwill,  
859 M. B. Araújo, and D. B. Stouffer. 2016*a*. Synthetic datasets and community  
860 tools for the rapid testing of ecological hypotheses. *Ecography* **39**:402–408. URL  
861 <http://doi.wiley.com/10.1111/ecog.01941>.
- 862 Poisot, T., D. B. Stouffer, and S. Kéfi. 2016*b*. Describe, understand and predict:  
863 why do we need networks in ecology? *Functional Ecology* **30**:1878–1882. URL  
864 <http://doi.wiley.com/10.1111/1365-2435.12799>.
- 865 Post, D. M., M. L. Pace, and N. G. Hairston. 2000. Ecosystem size determines  
866 food-chain length in lakes. *Nature* **405**:1047–1049.
- 867 Proulx, S. R., D. E. L. Promislow, and P. C. Phillips. 2005. Network thinking in  
868 ecology and evolution. *Trends in ecology & evolution* **20**:345–53. URL <http://www.ncbi.nlm.nih.gov/pubmed/16701391>.
- 870 QUINTESSANCE Consortium, M. E., S. Carpenter, e. al., G. Daily, e. al.,  
871 C. Raudsepp-Hearne, e. al., I. P. o. B. Services, Ecosystem, J. Silvertown,  
872 M. Schröter, e. al., S. Naeem, e. al., N. Biggs, e. al., A. Mashaghi, e. al.,

- 873 T. Ideker, R. Sharan, J. Gardy, e. al., T. Valente, D. Acemoglu, e. al., M. Jack-  
874 son, M. Janssen, e. al., G. Woodward, e. al., C. Mulder, J. Elser, R. Thomp-  
875 son, e. al., J. Montoya, e. al., O. Petchey, e. al., J. Reiss, e. al., A. Barabasi,  
876 R. Albert, F. Harary, R. Haines-Young, S. Macfadyen, e. al., K. Rathwell,  
877 G. Peterson, R. Costanza, I. Kubiszewski, C. Mulder, e. al., H. Tallis, e. al.,  
878 A. Tavoni, S. Levin, A. Ma, R. Mondragón, M. Pascual, J. Dunne, F. Jordán,  
879 e. al., H. Ernstson, e. al., U. Narloch, e. al., M. Hagen, e. al., R. Stewart,  
880 e. al., A. Shmida, M. Wilson, M. Palmer, e. al., G. Mace, e. al., R. d. Groot,  
881 e. al., H. Zimmermann, R. Albert, e. al., M. Pocock, e. al., K. Chan, e. al.,  
882 L. Dicks, e. al., G. McInerny, e. al., M. Pocock, e. al., A. Vespignani, D. Bo-  
883 han, e. al., P. Anderson, J. Cohen, e. al., J. Montoya, e. al., S. Pimm, C. Holling,  
884 A. Trichard, e. al., D. Bohan, and e. al. 2016. Networking Our Way to Better  
885 Ecosystem Service Provision. *Trends in ecology & evolution* **31**:105–15. URL  
886 <http://www.ncbi.nlm.nih.gov/pubmed/26777789>.
- 887 R Core Team, 2017. R: A Language and Environment for Statistical Computing.  
888 R Foundation for Statistical Computing, Vienna, Austria. URL [https://www.  
889 R-project.org/](https://www.R-project.org/).
- 890 Samuelson, P. A. 1948. *Economics: An Introductory Analysis*. McGraw–Hill Book  
891 Co., New York,.
- 892 Shen, H.-W., and A.-L. Barabasi. 2014. Collective credit allocation in science.  
893 *Proceedings of the National Academy of Sciences* **111**:12325–12330. URL [http:  
894 //www.pnas.org/content/111/34/12325.abstract](http://www.pnas.org/content/111/34/12325.abstract).
- 895 Sih, A., S. F. Hanser, and K. a. McHugh. 2009. Social network theory: New insights  
896 and issues for behavioral ecologists. *Behavioral Ecology and Sociobiology* **63**:975–  
897 988.
- 898 Simberloff, D., and B. V. Holle. 1999. Positive interactions of nonindigenous species:  
899 invasional meltdown? *Biological Invasions* pages 21–32.
- 900 Solé, R. V., and J. M. Montoya. 2001. Complexity and fragility in ecological networks.  
901 *Proceedings of the Royal Society B* **268**:2039–2045.
- 902 Stouffer, D. B., and J. Bascompte. 2010. Understanding food-web persistence from  
903 local to global scales. *Ecology Letters* **13**:154–161. URL [http://doi.wiley.com/  
904 10.1111/j.1461-0248.2009.01407.x](http://doi.wiley.com/10.1111/j.1461-0248.2009.01407.x).

- 905 Strogatz, S. H. 2001. Exploring complex networks. *Nature* **410**:268–76. URL  
906 <http://dx.doi.org/10.1038/35065725>.
- 907 Stumpf, M. P. H., W. P. Kelly, T. Thorne, and C. Wiuf. 2007. Evolution at the system  
908 level: the natural history of protein interaction networks. *Trends in ecology &  
909 evolution* **22**:366–373. URL <http://www.ncbi.nlm.nih.gov/pubmed/17475365>.
- 910 Sutherland, W. J., R. P. Freckleton, H. C. J. Godfray, S. R. Beissinger, T. Ben-  
911 ton, D. D. Cameron, Y. Carmel, D. A. Coomes, T. Coulson, M. C. Emmer-  
912 son, R. S. Hails, G. C. Hays, D. J. Hodgson, M. J. Hutchings, D. Johnson,  
913 J. P. G. Jones, M. J. Keeling, H. Kokko, W. E. Kunin, X. Lambin, O. T. Lewis,  
914 Y. Malhi, N. Mieszkowska, E. J. Milner-Gulland, K. Norris, A. B. Phillimore,  
915 D. W. Purves, J. M. Reid, D. C. Reuman, K. Thompson, J. M. J. Travis,  
916 L. A. Turnbull, D. A. Wardle, and T. Wiegand. 2013. Identification of 100  
917 fundamental ecological questions. *Journal of Ecology* **101**:58–67. URL <http://doi.wiley.com/10.1111/1365-2745.12025>.
- 919 Tansley, A. G. 1935. The Use and Abuse of Vegetational Concepts and Terms.  
920 *Ecology* **16**:284–307. URL [http://links.jstor.org/sici?sici=0012-9658\(1935\)16<281:193507\(1935\)3A3:1-3C284\(1935\)3ATUAAOV\(1935\)3E2.0.CO\(1935\)3B2-P](http://links.jstor.org/sici?sici=0012-9658(1935)16<281:193507(1935)3A3:1-3C284(1935)3ATUAAOV(1935)3E2.0.CO(1935)3B2-P).
- 922 Ulanowicz, R. E., 1986. Introduction. Pages 1–8 *in* *Growth and Develop-*  
923 *ment*. Springer New York, New York, NY. URL [http://link.springer.com/10.1007/978-1-4612-4916-0\(1986\)1http://link.springer.com/10.1007/978-1-4612-4916-0\(1986\)1](http://link.springer.com/10.1007/978-1-4612-4916-0(1986)1http://link.springer.com/10.1007/978-1-4612-4916-0(1986)1).
- 926 Ulanowicz, R. E., R. D. Holt, and M. Barfield. 2014. Limits on ecosystem trophic  
927 complexity: insights from ecological network analysis. *Ecology letters* **17**:127–36.  
928 URL <http://www.ncbi.nlm.nih.gov/pubmed/24382355>.
- 929 Ulrich, W., and N. J. Gotelli. 2007. Null model analysis of species nestedness  
930 patterns. *Ecology* **88**:1824–1831.
- 931 Ulrich, W., and N. J. Gotelli. 2010. Null model analysis of species associations  
932 using abundance data. *Ecology* **91**:3384–97. URL <http://www.ncbi.nlm.nih.gov/pubmed/21141199>.
- 934 Urban, D., and T. Keitt. 2001. Landscape connectivity: A graph-theoretic perspec-  
935 tive. *Ecology* **82**:1205–1218.
- 936 Valente, T. W., K. Coronges, C. Lakon, and E. Costenbader. 2008. How Correlated  
937 Are Network Centrality Measures? *Connections (Toronto, Ont.)* **28**:16–26.

- 938 Vermaat, J. E., J. a. Dunne, and A. J. Gilbert. 2009. Major dimensions in food-web  
939 structure properties. *Ecology* **90**:278–282. URL [http://www.ncbi.nlm.nih.gov/  
940 pubmed/19294932](http://www.ncbi.nlm.nih.gov/pubmed/19294932).
- 941 Visser, M. D., S. M. McMahon, C. Merow, P. M. Dixon, S. Record, E. Jonge-  
942 jans, W. Michener, M. Jones, S. Petrovskii, N. Petrovskaya, A. Ellison, B. Den-  
943 nis, G. Hager, G. Wellein, P. Zuidema, E. Jongejans, P. Chien, H. During,  
944 F. Schieving, B. V. Putten, M. Visser, H. Muller-Landau, P. Jansen, L. Comita,  
945 H. Muller-Landau, S. Aguilar, S. Hubbell, C. Merow, N. LaFleur, J. Silander,  
946 A. Wilson, M. Rubega, M. Visser, E. Jongejans, M. V. Breugel, P. Zuidema,  
947 Y.-Y. Chen, A. Kassim, J. Chambers, B. Kernighan, P. Plauger, G. Amdahl,  
948 A. Porter, R. Selby, R. Bryant, D. OHallaron, M. Schmidberger, M. Morgan,  
949 D. Eddelbuettel, H. Yu, L. Tierney, U. Mansmann, A. Grama, G. Karypis,  
950 V. Kumar, A. Gupta, P. LEcuyer, D. Eddelbuettel, R. François, D. Eddelbuet-  
951 tel, C. Sanderson, H. Robbins, S. Monro, A. Mantoglou, J. Wilson, A. Finley,  
952 Z. Merali, A. Guisan, A. Lehmann, S. Ferrier, M. Austin, J. Overton, B. Brook,  
953 J. OGrady, A. Chapman, M. Burgman, H. Akçakaya, R. Frankham, F. Isbell,  
954 V. Calcagno, A. Hector, J. Connolly, W. Harpole, P. Reich, E. V. Moran, J. Clark,  
955 G. Bohrer, G. Katul, R. Walko, and R. Avissar. 2015. Speeding Up Eco-  
956 logical and Evolutionary Computations in R; Essentials of High Performance  
957 Computing for Biologists. *PLOS Computational Biology* **11**:e1004140. URL  
958 <http://dx.plos.org/10.1371/journal.pcbi.1004140>.
- 959 Wang, S., and B. Chen. 2016. Energy-water nexus of urban agglomeration based on  
960 multiregional input-output tables and ecological network analysis: A case study  
961 of the Beijing-Tianjin-Hebei region. *Applied Energy* **178**:773–783.
- 962 Wasserman, S., and K. Faust. 1994. *Advances in Social Network Analysis: Research*  
963 *in the Social and Behavioral Sciences*. SAGE Publications. URL [http://books.  
964 google.com/books?hl=en&lr=&id=C6juDKDmvCcC&pgis=1](http://books.google.com/books?hl=en&lr=&id=C6juDKDmvCcC&pgis=1).
- 965 Williams, R. J., E. L. Berlow, J. a. Dunne, A.-L. Barabási, and N. D. Mar-  
966 tinez. 2002. Two degrees of separation in complex food webs. *Proceed-*  
967 *ings of the National Academy of Sciences of the United States of America*  
968 **99**:12913–12916. URL [http://www.pubmedcentral.nih.gov/articlerender.  
969 fcgi?artid=130559&tool=pmcentrez&rendertype=abstract](http://www.pubmedcentral.nih.gov/articlerender.fcgi?artid=130559&tool=pmcentrez&rendertype=abstract).
- 970 Williams, R. J., and N. D. Martinez. 2000. Simple rules yield complex food  
971 webs. *Nature* **404**:180–183. URL [http://www.nature.com/doifinder/10.1038/  
972 35004572](http://www.nature.com/doifinder/10.1038/35004572).

- 973 Wilson, E. O., 1999. Consilience: The unity of knowledge.
- 974 Woodward, G. U. Y., J. P. Benstead, O. S. Beveridge, J. Blanchard, T. Brey, L. E.  
975 E. E. Brown, W. F. Cross, N. Friberg, C. Ings, U. T. E. Jacob, S. Jennings, M. E.  
976 Ledger, A. M. Milner, J. M. Montoya, E. O. Gorman, J. M. Olesen, O. L. Petchey,  
977 E. Pichler, D. C. Reuman, M. S. A. Thompson, F. J. F. V. a. N. Veen, G. Yvon-  
978 Durocher, T. C. Ings, U. T. E. Jacob, S. Jennings, M. E. Ledger, A. M. Milner,  
979 J. M. Montoya, E. O 'gorman, J. M. Olesen, O. L. Petchey, D. E. Pichler, D. C.  
980 Reuman, M. S. A. Thompson, F. J. F. Van Veen, and G. Yvon-Durocher. 2010.  
981 Ecological Networks in a Changing Climate. *Advances In Ecological Research* 42.  
982 Ecological Networks. **42**:72–120.
- 983 Xia, L., B. D. Fath, U. M. Scharler, and Y. Zhang. 2016. Spatial variation in the  
984 ecological relationships among the components of {Beijing}'s carbon metabolic  
985 system. *Science of the Total Environment* **544**:103–113.
- 986 Yang, J., and B. Chen. 2016. Energy–water nexus of wind power generation systems.  
987 *Applied Energy* **169**:1–13.
- 988 Yodzis, P., and S. Innes. 1992. Body Size and Consumer-Resource Dynamics. *The*  
989 *American Naturalist* **139**:1151–1175. URL <http://www.journals.uchicago.edu/doi/10.1086/285380>.
- 991 Zhao, L., H. Zhang, E. J. O'Gorman, W. Tian, A. Ma, J. C. Moore, S. R. Borrett,  
992 and G. Woodward. 2016. Weighting and indirect effects identify keystone species  
993 in food webs. *Ecology Letters* **19**:1032–1040.
- 994 Zinkgraf, M., L. Liu, A. Groover, and V. Filkov. 2017. Identifying gene coex-  
995 pression networks underlying the dynamic regulation of wood-forming tissues in  
996 *Populus* under diverse environmental conditions. *New Phytologist* URL  
997 <http://doi.wiley.com/10.1111/nph.14492>.

## 998 Acknowledgments

999 This work was supported by the US National Science Foundation under grant SSI-  
1000 1450277 End-to-End Provenance

<sup>1001</sup> **Author contributions statement**

<sup>1002</sup> All authors contributed to the conception, writing and review of the manuscript.

## 1003 Boxes

1004 *Box 1. Benchmarking Ecological Models* The most basic test is to feed the algorithm  
1005 a set of "random" matrices to make sure that the frequency of statistically significant  
1006 results is no greater than 5%. Otherwise, the algorithm is vulnerable to a Type I  
1007 statistical error (incorrectly rejecting a true null hypothesis). However, specifying a  
1008 matrix produced by random sampling errors is not so easy. By definition, if a null  
1009 model algorithm is used to generate the random matrices, then no more than 5%  
1010 of them should be statistically significant (unless there were programming errors).  
1011 For binary matrices, two log-normal distributions can be used to generate realistic  
1012 heterogeneity in row and column totals, while still maintaining additive effects for cell  
1013 occurrence probabilities (Ulrich and Gotelli, 2010). "Structured" matrices are needed  
1014 to test for Type II errors (incorrectly accepting a false null hypothesis), and these  
1015 require a careful consideration of exactly what sort of pattern or mechanism the test  
1016 is designed to reveal. One approach is to begin with a perfectly structured matrix,  
1017 such as one derived from a mechanistic model for generating network structure,  
1018 contaminate it with increasing amounts of stochastic noise, and test for the statistical  
1019 pattern at each step (Gotelli, 2000). A plot of the  $P$  value versus the added noise  
1020 should reveal an increasing curve, and will indicate the signal-to-noise ratio below  
1021 which the test cannot distinguish the pattern from randomness. Alternatively, one  
1022 can begin with a purely random matrix but embed in it a non-random substructure,  
1023 such as a matrix clique or a node with extreme centrality. The size, density, and  
1024 other attributes of this matrix can be manipulated to see whether the test can still  
1025 detect the presence of the embedded structure (Gotelli et al., 2010). Because all  
1026 null model tests (and all frequentist statistics) are affected by sample size and data  
1027 structure, these benchmark tests can be tailored to the attributes of the empirical  
1028 data structures for better focus and improved inference.

1029 Even simple randomization algorithms may require further filters to ensure that  
1030 random matrices retain a number of desirable network properties. For example,  
1031 Dunne et al. (2002) created random food-web matrices with constant species rich-  
1032 ness and connectance, but they discarded webs with unconnected nodes and subwebs  
1033 because these topologies were not observed in the empirical webs. A "stub recon-  
1034 struction" algorithm builds a topology that is constrained to the observed number  
1035 of edges per node (Newman et al., 2001). Each node is assigned the correct number  
1036 of edges, and then nodes are successively and randomly paired to create a growing  
1037 network. However, this algorithm also generates multiple edges between the same  
1038 two nodes, which must be discarded or otherwise accounted for. Maslov and Sneppen  
1039 (2002) use a "local re-wiring algorithm" that preserves the number of connections



1040 for every node by swapping edges randomly between different pairs of nodes. This  
1041 algorithm is closely analogous to the swap algorithm used in species co-occurrence  
1042 analyses that preserves the row and column totals of the original matrix (Connor  
1043 and Simberloff, 1979). The more constraints that are added to the algorithm, the  
1044 less likely it is that simple sampling processes can account for patterns in the data.  
1045 However, some constraints, such as connectivity or matrix density, may inadvertently  
1046 “smuggle in” the very processes they are designed to detect. This can lead to the  
1047 so-called “Narcissus” effect (Colwell and Winkler, 1984). Finding the correct balance  
1048 between realistic constraints and statistical power is not easy (Gotelli et al., 2012),  
1049 and there are many potential algorithms that reasonably could be used, even for  
1050 simple binary matrices (Gotelli, 2000).

1051 **Tables**

| Sub-discipline | Level | Metric                 | Concept                                                                                                                                                  | Reference                                                                                      |
|----------------|-------|------------------------|----------------------------------------------------------------------------------------------------------------------------------------------------------|------------------------------------------------------------------------------------------------|
| General        | W     | Density                | The proportion of possible edges that are actually associated with nodes; called Connectance in Food Web ecology.                                        |                                                                                                |
| General        | N     | Centrality             | Multiple ways to characterize the relative importance of nodes.                                                                                          | Wasserman and Faust (1994)                                                                     |
| General        | N     | Degree                 | Number of edges connected to a given node, which is a type of local centrality.                                                                          |                                                                                                |
| General        | N     | Eigenvector Centrality | Global centrality metric based on number of walks that travel through a node                                                                             | Bonacich (1987)                                                                                |
| General        | W     | Centralization         | Shape of the frequency distribution of edges among nodes.                                                                                                | Barabási and Albert (1999); Dunne et al. (2002)                                                |
| General        | W     | Graph diameter         | The concentration (versus evenness) of centrality among the nodes.                                                                                       | Freeman (1979)                                                                                 |
| General        | W     | Modularity             | The longest path between any two nodes in a graph.                                                                                                       | Barabási et al. (2000); Urban and Keitt (2001)                                                 |
| General        | G     | Motifs                 | Degree to which edges are distributed within rather than between distinct sets of nodes.                                                                 | Newman (2010)                                                                                  |
| General        | N     | Link density           | Small sets of nodes with similar distributions of edges.                                                                                                 | Milo et al. (2002)                                                                             |
| Community      | N     | Temperature            | Average number of edges per node.                                                                                                                        | Martinez (1992)                                                                                |
| Community      | W     | Co-occurrence          | Measures the nestedness of a bipartite network.                                                                                                          | Ulrich and Gotelli (2007)                                                                      |
| Community      | N     | Indicator Species      | Degree of overlapping spatial or temporal distributions of species relative to a null model.                                                             | Gotelli (2000)                                                                                 |
| Community      | W     | Nestedness             | The degree to which the abundance of a taxonomic group responds to an environmental gradient.                                                            |                                                                                                |
| Community      | W     | Evenness               | The degree to which interactions can be arranged into subsets of the larger community                                                                    |                                                                                                |
| Community      | W     | Diversity              | Deviation of the distribution of observed abundances relative to an even distribution among taxonomic groups in a community                              |                                                                                                |
| Community      | W     | Richness               | Distribution of abundances among taxonomic groups in an observed community                                                                               |                                                                                                |
| Community      | W     | Stability              | The number of taxonomic groups in a community                                                                                                            |                                                                                                |
| Food-Web       | N     | Removal Importance     | The change in the abundances of taxonomic groups across a set of observations                                                                            |                                                                                                |
| General        | N     | Connectance            | The degree to which removal of a compartment or species produces subsequent removals in the ecosystem.                                                   | Borrvall et al. (2000); Dunne et al. (2002); Eklöf and Ebenman (2006); Solé and Montoya (2001) |
| Food-Web       | G     | Food-chain length      | Proportion of realized out of possible edges                                                                                                             | Pimm (1982); Vermaat et al. (2009)                                                             |
| Ecosystem      | W     | Finn cycling index     | The number of feeding relationships among a set of compartments in a food-web.                                                                           | Post et al. (2000); Ulanowicz et al. (2014)                                                    |
| Ecosystem      | G     | Environ                | Degree to which matter or energy passes through the same set of compartments.                                                                            | Finn (1980)                                                                                    |
| Ecosystem      | N     | Throughflow            | The sub-network of the probability of movement of energy or matter among compartments generated by a single unit of input (output) into a selected node. | Patten (1978); Patten and Auble (1981)                                                         |
| Ecosystem      | N     | Throughflow Centrality | Amount of energy or matter passing into or out of a node                                                                                                 | Finn (1976)                                                                                    |
| General        | G     | Chain Length           | The proportion of energy or matter that passes through a given compartment in an ecosystem.                                                              | Borrett (2013)                                                                                 |
| Food-Web       | G     | Average Path Length    | Number of edges between two nodes in a group                                                                                                             |                                                                                                |
| Ecosystem      | W     | Pathway Proliferation  | The average number of times a unit of matter or energy travels from one compartment to another before exiting the ecosystem                              | Finn (1976)                                                                                    |
| Ecosystem      | W     | Ascendency             | Rate of increase in the number of edges between nodes with increasing path length                                                                        | Borrett et al. (2007)                                                                          |
| Food-Web       | N     | Trophic Level          | Measures the average similarity in matter or energy flows among compartments in an ecosystem.                                                            | Ulanowicz (1986)                                                                               |
|                |       |                        | Ordinal classification of a compartment or taxonomic group based on the relative position in the ecosystem.                                              | Allesina and Pascual (2009); Fath (2004); Williams et al. (2002)                               |

Table 1: Ecological network metric summary and classification. Level indicates the hierarchy of the metric (W = Whole network, G = Group or sub-network, N = Node). The Sub-disciplines include 'General' network theory, 'Community' ecology, 'Food-web' and 'Ecosystem' ecology. Also available at <https://figshare.com/s/1bf1a7e0a6ee3ac97a4b>

1052 **Figures**

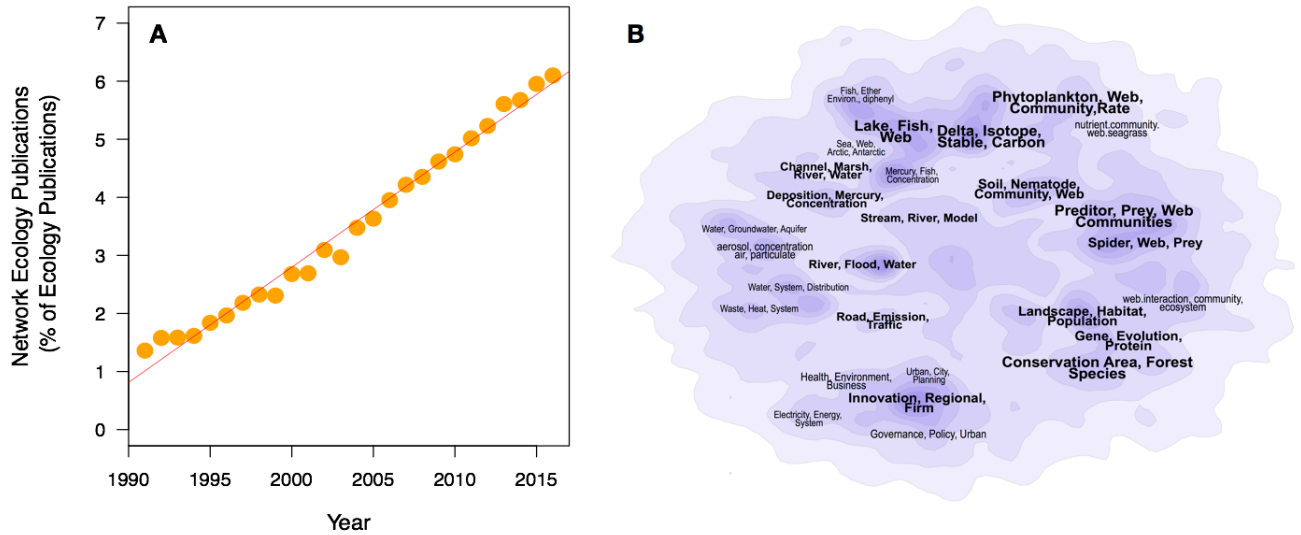

Figure 1: Although systems thinking has been a part of ecology since at least the work of Darwin, network ecology has grown rapidly since the turn of the last century but has been developing in isolated sub-fields. (A) Plot showing the increase in “network ecology” keywords in the literature from 1991 to current (updated search based on Borrett et al., 2014). (B) Contour plot of common topics in network ecology with peaks indicating clusters of related topics. The regions are labeled with the most common terms found in the clusters. From Borrett et al. (2014), reproduced with permission.

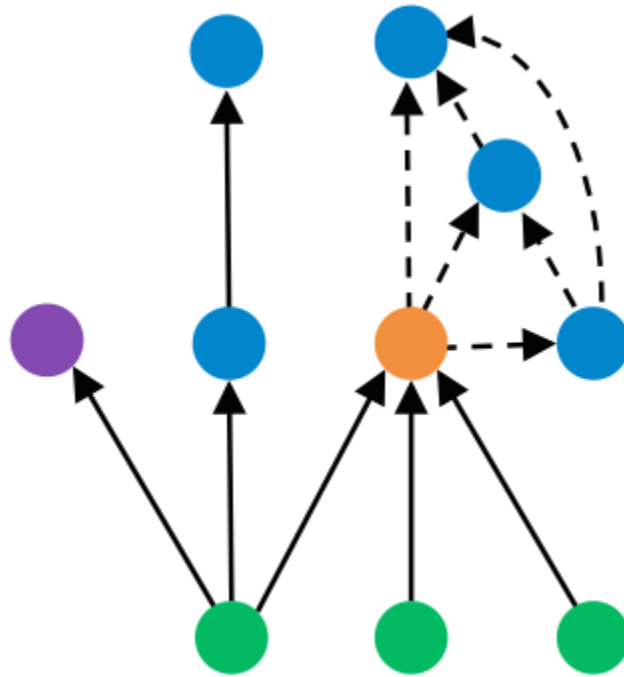

Figure 2: Hypothetical unweighted, directed network showing examples of the four classes of network metrics. *Node Level*: the purple node exhibits low centrality while the orange node exhibits high centrality. *Group or Sub-Network Level*: the blue nodes connected with dashed edges shows a module. *Global or Whole Network Level*: using the edges of all nodes we can measure the connectance of the entire network ( $c = \text{edges}/\text{nodes}^2 = 0.12$ ).
